# Supplementary material for: Sex-dependent expression of neutrophil gelatinase-associated lipocalin in aortic stenosis
Source: PubMed Central journal article supplement (PMC9743642; doi:10.1186/s13293-022-00480-w), 2022-12-12

**A**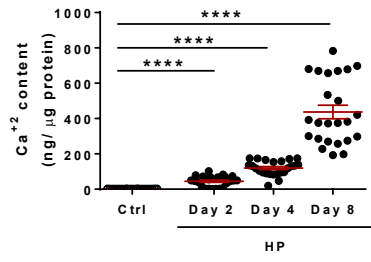**B**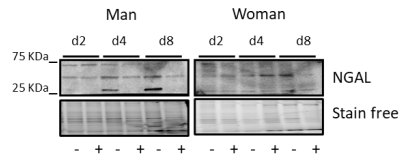

**A**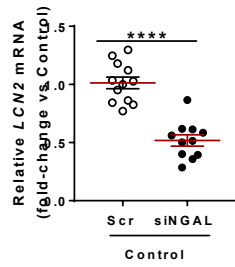**B**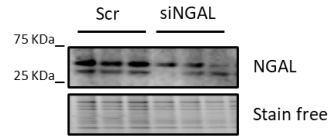**C**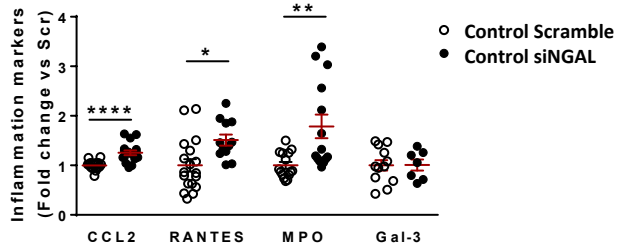**D**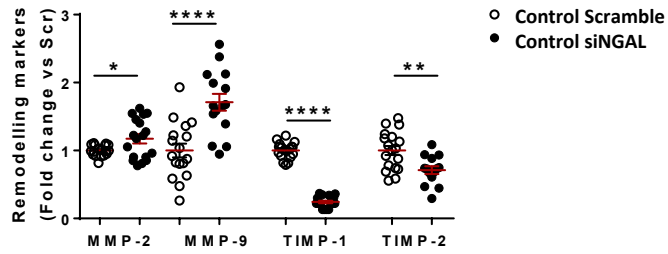**E**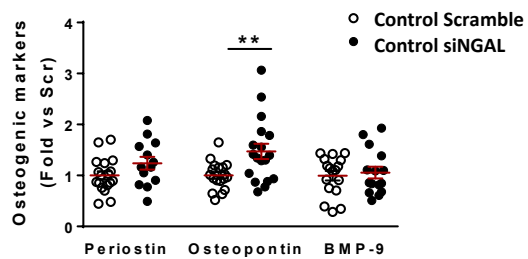**F**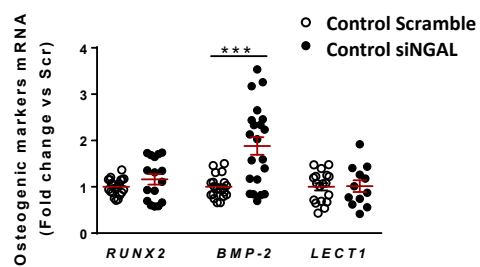

**A**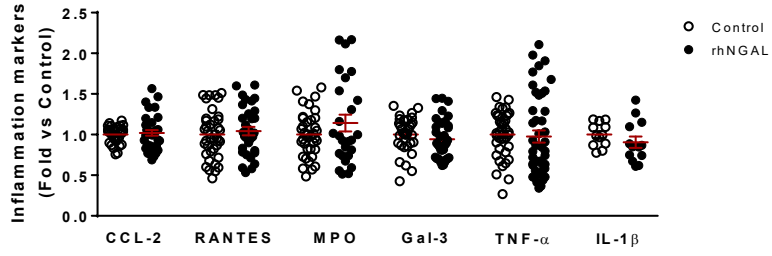**B**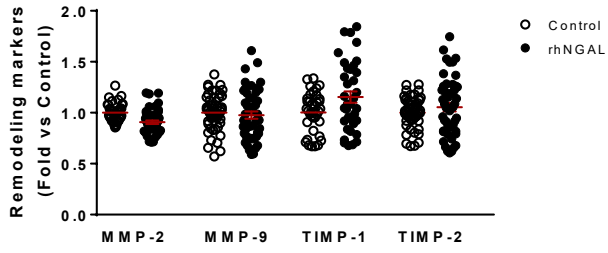**C**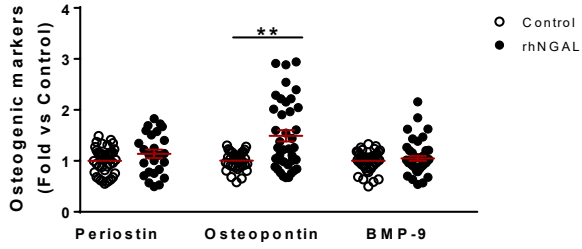

Supplement: 13293_2022_480_MOESM2_ESM.pdf [file 13293_2022_480_MOESM2_ESM.pdf]
